# Supplementary material
Source: Springer Nature journal article supplement (https://www.springermedizin.de/resource/supplementary/13058_2006_1574_MOESM4_ESM.pdf/9699428)
Supplement: MOESM4 [file 9699428]

| Patient | ER       | Grade  | HER2     | PR       | Lymph Node Status | Age | Tumor Size | Menopausal Status  | Type      | Recurrence | Cellularity |
|---------|----------|--------|----------|----------|-------------------|-----|------------|--------------------|-----------|------------|-------------|
| 018     | Positive | III    | Positive | Negative | Positive          | 77  | 40         | Post-menopause     | Adjacent  | Yes        | Low         |
| 345     | Positive | III    | Positive | Negative | Negative          | 56  | 46         | Post-menopause     | Adjacent  | No         | -           |
| 136     | Positive | III    | Negative | Positive | Positive          | 48  | 90         | Pre-menopause      | Adjacent  | No         | -           |
| 190     | Positive | III    | Negative | Negative | Positive          | 63  | 30         | Surgical menopause | Adjacent  | No         | -           |
| 295     | Positive | III    | Negative | Positive | Negative          | 46  | 24         | Pre-menopause      | Adjacent  | No         | -           |
| 301     | Positive | III    | Negative | Positive | Negative          | 60  | 18         | -                  | Adjacent  | No         | Low         |
| 351     | Positive | III    | Negative | Negative | Negative          | 67  | 21         | Post-menopause     | Adjacent  | No         | Low         |
| 453     | Positive | III    | Negative | Positive | Negative          | 64  | 17         | Post-menopause     | Adjacent  | No         | Low         |
| 070     | Positive | III    | -        | Positive | Positive          | 51  | 20         | Surgical menopause | Adjacent  | Yes        | -           |
| 047     | Positive | II     | Positive | Positive | Positive          | 62  | 20         | Post-menopause     | Adjacent  | No         | High        |
| 057     | Positive | II     | Positive | Negative | Positive          | 54  | 20         | Surgical menopause | Adjacent  | No         | -           |
| 076     | Positive | II     | Positive | Negative | Positive          | 60  | 35         | Post-menopause     | Adjacent  | No         | High        |
| 083     | Positive | II     | Positive | Negative | Negative          | 59  | 20         | Post-menopause     | Adjacent  | No         | -           |
| 063     | Positive | II     | Negative | Negative | Positive          | 54  | 22         | Surgical menopause | Adjacent  | No         | -           |
| 223     | Positive | II     | Negative | Positive | Positive          | 49  | 12         | Pre-menopause      | Adjacent  | No         | -           |
| 281     | Positive | II     | Negative | Positive | Positive          | 53  | 35         | Pre-menopause      | Adjacent  | No         | -           |
| 409     | Positive | II     | Negative | Negative | Negative          | 64  | 18         | Post-menopause     | Adjacent  | No         | High        |
| 065     | Positive | II     | Negative | Positive | Negative          | 44  | 18         | Surgical menopause | Adjacent  | No         | -           |
| 161     | Positive | II     | Negative | Negative | Positive          | 70  | 10         | Surgical menopause | Adjacent  | No         | -           |
| 344     | Positive | II     | Negative | Positive | Negative          | 75  | 21         | Surgical menopause | Adjacent  | No         | -           |
| 027     | Positive | II     | -        | Positive | Negative          | 50  | 20         | Post-menopause     | Adjacent  | No         | -           |
| 366     | Negative | III    | Positive | Negative | Negative          | 46  | 17         | Pre-menopause      | Adjacent  | No         | Low         |
| 113     | Negative | III    | Positive | Negative | Positive          | 51  | 15         | Surgical menopause | Adjacent  | No         | -           |
| 075     | Negative | III    | Negative | Negative | Negative          | 58  | 25         | Post-menopause     | Adjacent  | Yes        | -           |
| 086     | Negative | III    | Negative | Negative | Negative          | 43  | 20         | Pre-menopause      | Adjacent  | Yes        | -           |
| 259     | Negative | III    | Negative | Positive | Negative          | 32  | 20         | Pre-menopause      | Adjacent  | No         | Low         |
| 315     | Negative | III    | Negative | Negative | Positive          | 55  | 29         | Peri-menopause     | Adjacent  | Yes        | High        |
| 348     | Negative | III    | Negative | Negative | Positive          | 40  | 25         | Pre-menopause      | Adjacent  | No         | Low         |
| 359     | Negative | III    | Negative | Negative | Negative          | 56  | 19         | Surgical menopause | Adjacent  | -          | Low         |
| 392     | Negative | III    | Negative | Negative | Negative          | 64  | 18         | Post-menopause     | Adjacent  | No         | -           |
| 122     | Negative | III    | Negative | Positive | Negative          | 60  | 26         | Post-menopause     | Adjacent  | No         | -           |
| 372     | Negative | III    | Negative | Negative | Negative          | 35  | 38         | -                  | Adjacent  | No         | -           |
| 039     | Negative | II     | -        | Negative | Negative          | 64  | 18         | Post-menopause     | Adjacent  | No         | -           |
| 247     | -        | II     | -        | -        | Negative          | 67  | 15         | Post-menopause     | Adjacent  | No         | -           |
| 043     | Normal   | Normal | Normal   | Normal   | Normal            | 31  | Normal     | Pre-menopause      | Reduction | No         | High        |
| 132     | Normal   | Normal | Normal   | Normal   | Normal            | 27  | Normal     | Pre-menopause      | Reduction | No         | -           |
| 152     | Normal   | Normal | Normal   | Normal   | Normal            | 47  | Normal     | Pre-menopause      | Reduction | No         | -           |
| 153     | Normal   | Normal | Normal   | Normal   | Normal            | 27  | Normal     | -                  | Reduction | No         | High        |
| 019     | Normal   | Normal | Normal   | Normal   | Normal            | 31  | Normal     | -                  | Reduction | No         | High        |
| 036     | Normal   | Normal | Normal   | Normal   | Normal            | 48  | Normal     | Post-menopause     | Reduction | No         | -           |
| 044     | Normal   | Normal | Normal   | Normal   | Normal            | 44  | Normal     | Surgical menopause | Reduction | No         | -           |
| 052     | Normal   | Normal | Normal   | Normal   | Normal            | 33  | Normal     | Pre-menopause      | Reduction | No         | -           |
| 193     | Normal   | Normal | Normal   | Normal   | Normal            | 57  | Normal     | Post-menopause     | Reduction | No         | -           |
| 101     | Normal   | Normal | Normal   | Normal   | Normal            | 54  | Normal     | Pre-menopause      | Reduction | No         | High        |

Supplementary Table S4:
